# Supplementary material
Source: PubMed Central journal article supplement (PMC4151218)
Supplement: JCI74281sd.pdf [file JCI74281sd.pdf]

**Supplemental Table 1.** Potency of the NO donor Spermine-NONOate in the aorta and size of mesenteric arteries used in the isolated vascular reactivity studies from male and female WT and ecCNP KO mice. n=6.

| <b><i>Genotype</i></b> | <b><i>Spermine-NONOate pEC<sub>50</sub> (M)</i></b> | <b><i>Vessel diameter (μm)</i></b> |
|------------------------|-----------------------------------------------------|------------------------------------|
| <b>Male WT</b>         | 6.65±0.04                                           | 157±6                              |
| <b>Male ecCNP KO</b>   | 6.80±0.03                                           | 151±5                              |
| <b>Female WT</b>       | 6.48±0.04                                           | 156±10                             |
| <b>Female ecCNP KO</b> | 6.75±0.08                                           | 154±8                              |

**Supplemental Table 2.** Standard deviation of NN intervals (SDNN), low frequency powers(LF), high frequency powers(HF), and the LF/HF ratio (sympathovagal balance) in male and female WT and ecCNP KO mice. n=11. \*p<0.05, significantly different to female WT littermates.

| <b>Genotype</b>        | <b>SDNN (ms)</b> | <b>LF (ms<sup>2</sup>)</b> | <b>HF (ms<sup>2</sup>)</b> | <b>LF/HF ratio</b> |
|------------------------|------------------|----------------------------|----------------------------|--------------------|
| <b>Male WT</b>         | 6.99±0.18        | 11.01±1.09                 | 11.75±0.67                 | 0.86±0.07          |
| <b>Male ecCNP KO</b>   | 7.88±0.26        | 14.17±1.81                 | 19.27±3.27                 | 0.91±0.19          |
| <b>Female WT</b>       | 8.07±0.33        | 8.79±1.28                  | 16.34±3.04                 | 0.60±0.08          |
| <b>Female ecCNP KO</b> | 10.13±1.08       | 20.77±3.97*                | 19.54±2.54                 | 1.14±0.16*         |

**Supplemental Table 3.** Venule diameter, centreline erythrocyte velocity, and wall shear rate of vessels explored in the intravital microscopy studies. n=5.

| <b><i>Genotype</i></b> | <b><i>Venule diameter<br/>(<math>\mu\text{m}</math>)</i></b> | <b><i>Centreline velocity<br/>(mm/s)</i></b> | <b><i>Wall shear rate<br/>(per s)</i></b> |
|------------------------|--------------------------------------------------------------|----------------------------------------------|-------------------------------------------|
| <b>WT</b>              | 25.8 $\pm$ 0.8                                               | 2.06 $\pm$ 0.07                              | 391 $\pm$ 45.9                            |
| <b>ecCNP KO</b>        | 22.9 $\pm$ 2.2                                               | 1.97 $\pm$ 0.06                              | 394 $\pm$ 42.0                            |

**Supplemental Table 4.** Plasma lipid levels in WT and ecCNP KO mice. n=5.

| <b>Genotype</b> | <b><i>Total cholesterol<br/>(mg/dL)</i></b> | <b><i>HDL cholesterol<br/>(mg/dL)</i></b> | <b><i>LDL cholesterol<br/>(mg/dL)</i></b> |
|-----------------|---------------------------------------------|-------------------------------------------|-------------------------------------------|
| <b>WT</b>       | 361.6±32.3                                  | 23.1±3.5                                  | 338.4±30.7                                |
| <b>ecCNP KO</b> | 297.6±34.0                                  | 27.0±5.7                                  | 270.6±32.6                                |

**Supplemental Table 5.** Circulating cell populations (cells/uL) in whole blood from WT and ecCNP KO mice. n=5.

| <b>Genotype</b> | <b><i>Neutrophils</i></b> | <b><i>Monocytes</i></b> | <b><i>T-lymphocytes</i></b> | <b><i>B-lymphocytes</i></b> | <b><i>Platelets</i></b>    |
|-----------------|---------------------------|-------------------------|-----------------------------|-----------------------------|----------------------------|
| <b>WT</b>       | 392.1±112.9               | 133.4±40.5              | 870.4±158.1                 | 1742.0±332.8                | 1.21x10 <sup>6</sup> ±4983 |
| <b>ecCNP KO</b> | 359.6±41.2                | 117.7±32.6              | 1044.0±86.18                | 1921.0±421.7                | 1.11x10 <sup>6</sup> ±7511 |

**Supplemental Table 6.** Comparison of mean arterial blood pressure (MABP) in WT, ecCNP KO, and ecCNP/ApoE dKO mice. n=8 (WT & ecCNP KO) or n=3 (ecCNP/ApoE dKO). \*\*\*p<0.001, data significantly different to WT.

| <b>Sex</b>    | <b><i>WT</i></b> | <b><i>ecCNP KO</i></b> | <b><i>ecCNP/ApoE dKO</i></b> |
|---------------|------------------|------------------------|------------------------------|
| <b>Male</b>   | 112.0±0.61       | 110.4±0.60             | 112.8±0.92                   |
| <b>Female</b> | 105.3±0.56       | 117.0±0.82***          | 114.3±1.09***                |

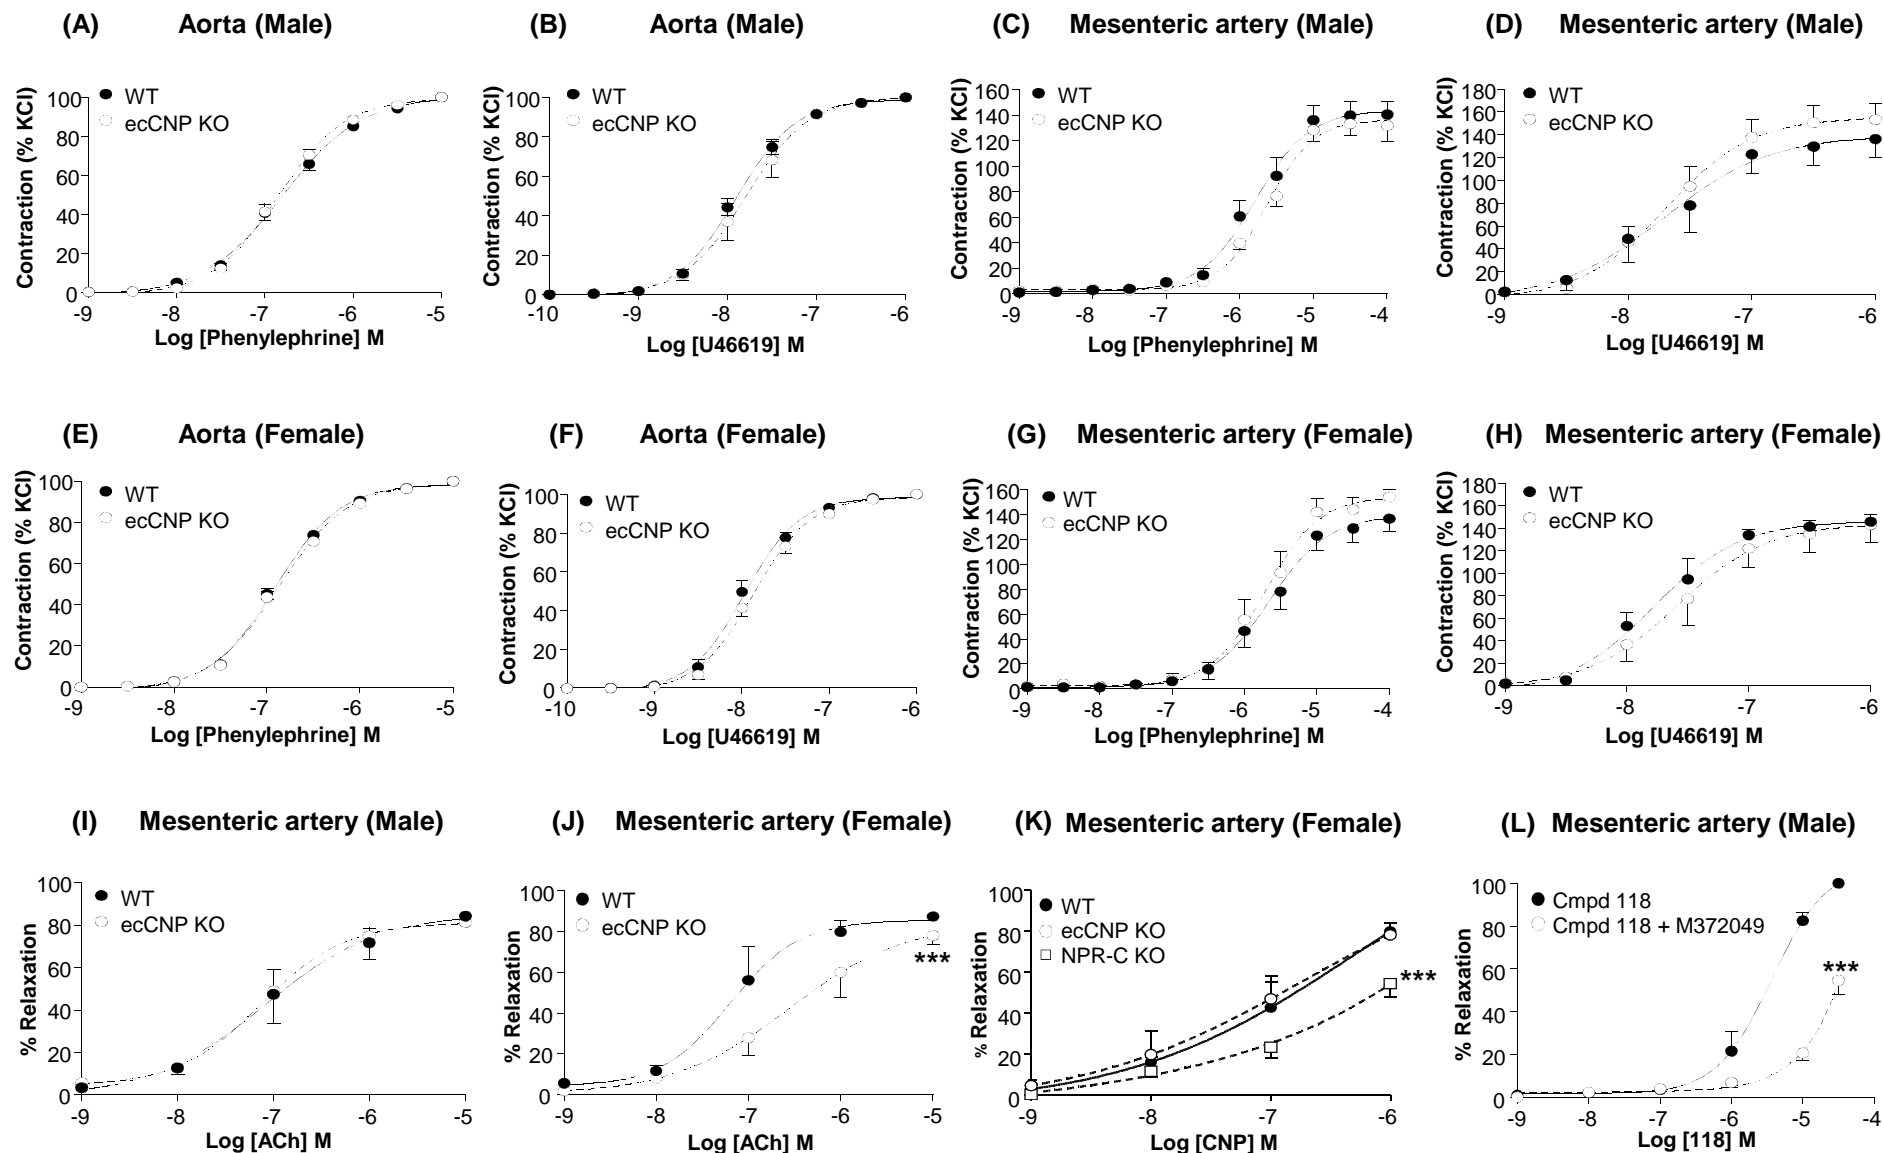

**Supplemental Figure 1. Vascular responses in ecCNP KO mice.** Vasoconstrictor reactivity to the  $\alpha_1$ -adrenoceptor agonist phenylephrine and the thromboxane- $A_2$  mimetic U46619 in male (**A-D**) and female (**E-H**) aorta and mesenteric arteries was essentially identical in WT and ecCNP KO mice. Endothelium-dependent relaxation to acetylcholine (ACh) in the mesenteric artery of male ecCNP KO animals was unaltered in comparison to littermate controls (**I**). In contrast, there was a significant decrease in potency (rightward shift) of the concentration response curve to ACh in the mesenteric arteries of female ecCNP KO animals (**J**). The potency of CNP was not altered in WT versus ecCNP KO mouse mesenteric arteries, but blunted in NPR-C KO vessels (**K**). Responses to the novel NPR-C agonist compound 118 (**L**) were inhibited by the selective NPR-C antagonist M372049. Vasorelaxant responses in (**K**) and (**L**) were obtained in the presence of L-NAME and indomethacin. Data are represented as the mean  $\pm$  s.e.m.  $n=6$  for the isolated vessel studies. \*\*\* $p<0.001$ , significantly different to WT littermates (**J**) or absence of M372049 (**L**).

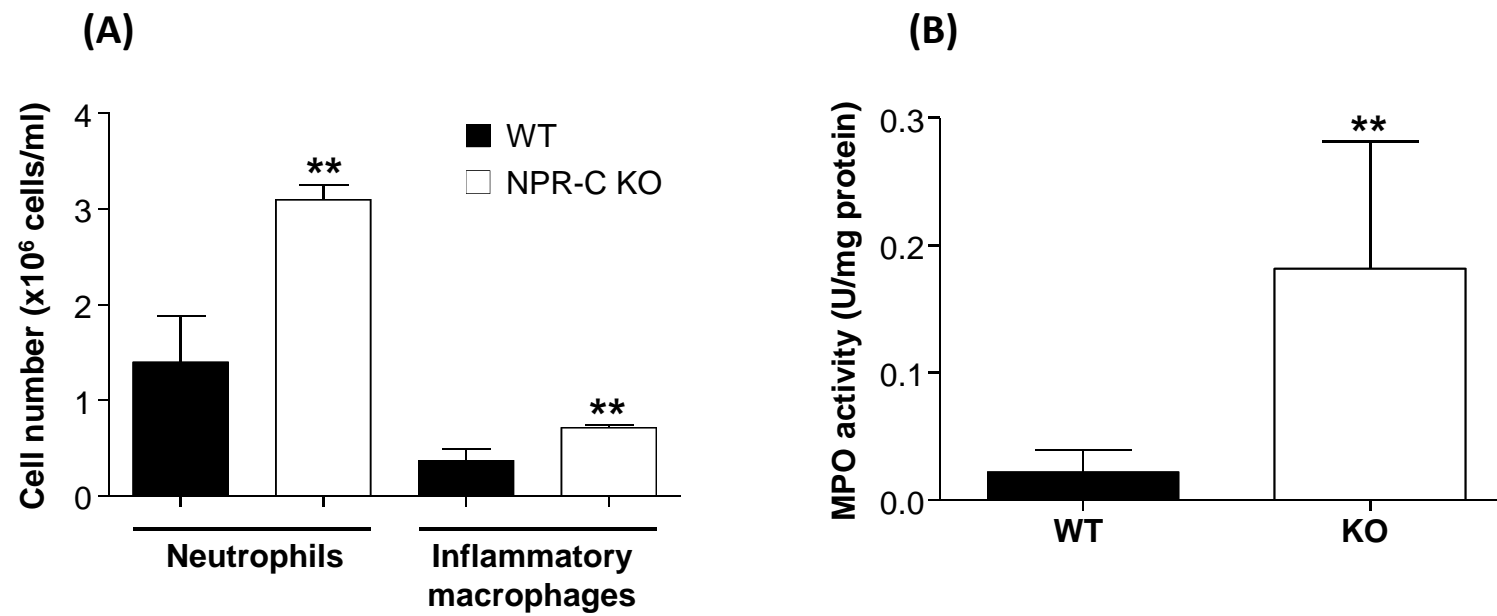

**Supplemental Figure 2. Enhanced inflammatory response in ecCNP KO mice.** Total cell number (**A**) and tissue MPO activity (**B**) in WT and ecCNP KO mice with TNF $\alpha$ -induced peritonitis. Data are represented as the mean $\pm$ s.e.m.  $n=4$ . \*\* $p<0.01$  data significantly different to WT littermates.

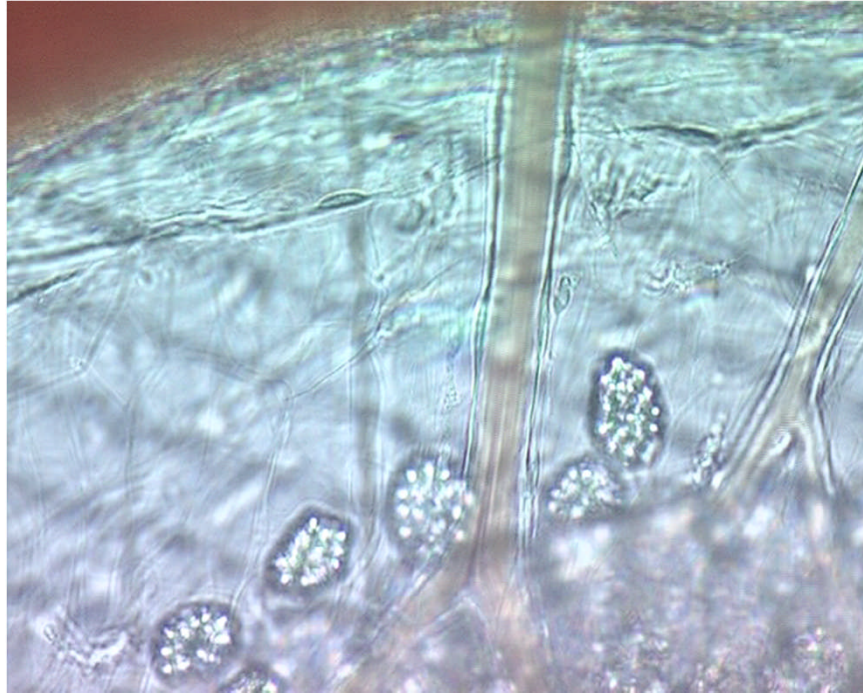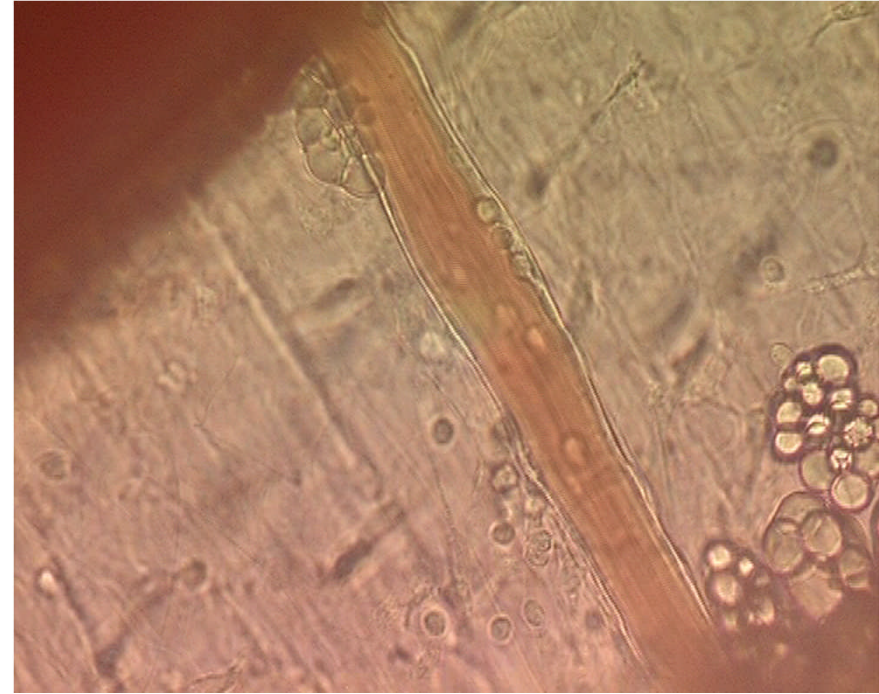

**Supplementary Video files. Leukocyte hyperreactivity in ecCNP KO mice.** Representative intravital microscopy videos showing increased basal leukocyte rolling in ecCNP KO mouse post-capillary venules (*right panel*) as compared to WT littermates (*left panel*). Representative of at least 10 separate experiments.
